# Supplementary material
Source: Research Square preprint supplement (doi:10.21203/rs.3.rs-10186438/v1)
Supplement: Supplementary file 2 [file 6cce25343e2efced3ed408ae.docx]

Highlights：

1. CRU increased maize yield by 8.0%, NAE by 34.2%,NUE by 10.6% compared to U.

2. CRU reduces the disturbance of inorganic N reservoir in the 0-40cm soil layer.

3. CRU reduced apparent N loss by 35.5% compared to U.

4. CRU increased Nmin by 65.9%-71.0% (0-40cm), reduced Nmin by 38.2%-41.6% (60-100cm).

5. CRU improved the overall economic and environmental benefits by 12.7%.
