# Supplementary material
Source: Research Square preprint supplement (doi:10.21203/rs.3.rs-10186438/v1)
Supplement: Supplementary file 3 [file f307446247609d5a59cf16ef.docx]

Dear Editors,

This research presents several novel and significant contributions to the field of nitrogen management in intensive agricultural systems, particularly for summer maize in the North China Plain (NCP).

In existing research, **data on the coupling of CRU release characteristics and nitrogen uptake dynamics of summer maize in the North China Plain are still relatively limited**. In this study, we provide detailed nutrient release curves, spatiotemporal distribution of soil inorganic nitrogen, nitrogen gas emissions and leaching fluxes, as well as system nitrogen balance calculations, providing empirical evidence for the scientific application and product development of controlled-release fertilizers:

1. **Multi-Scale and Mechanistic Investigation:** The research uniquely integrates a two-year field experiment with **micro-zone spatial analysis** to elucidate the spatio-temporal synchronization between controlled-release urea (CRU) nutrient release and crop N uptake. This approach provides how CRU modifies soil mineral N (Nmin) distribution at both macro (field plot) and micro (rhizosphere) scales, and reducing the initial localized "burst" of soil inorganic N concentration by 78–82% compared to compared to conventional urea (U).
2. **Quantification of a Synergistic Mechanism:** The findings support and quantify a proposed **"nutrient slow release–environmental control–crop efficiency enhancement" synergistic mechanism**. The work demonstrates how CRU release property not only supplies N in synchrony with crop demand but also directly mitigates key N loss pathways (reducing NH₃ volatilization by ~55%, N₂O emissions by 68.8%, and nitrate leaching by 27.3%), thereby enhancing both N use efficiency (NUE) and yield.
3. **Demonstration of Dual Benefits for Sustainable Intensification:** The research robustly demonstrates that a single basal application of CRU can achieve the **dual goals of sustainable intensification**: significantly increasing maize yield (+8.0%) and farmers' net income (+12.7%) while simultaneously sharply reducing the environmental N footprint (apparent N loss -35.5%). This offers a concrete, practical strategy for "high yield with low emissions" in a critical grain-producing region.

This research not only verified the application potential of CRU in the summer maize system of the North China Plain, but also provided a technical model for the region to achieve "reducing fertilizer use while increasing efficiency and promoting green development". We believe that this research is of great significance for promoting technological innovation in controlled-release fertilizers, optimizing nitrogen management strategies, and achieving sustainable and intensive agricultural development.

Thank you for your time and for considering our work.

Sincerely,

Yanping Zhang
