# Supplementary material
Source: Research Square preprint supplement (doi:10.21203/rs.3.rs-10186438/v1)

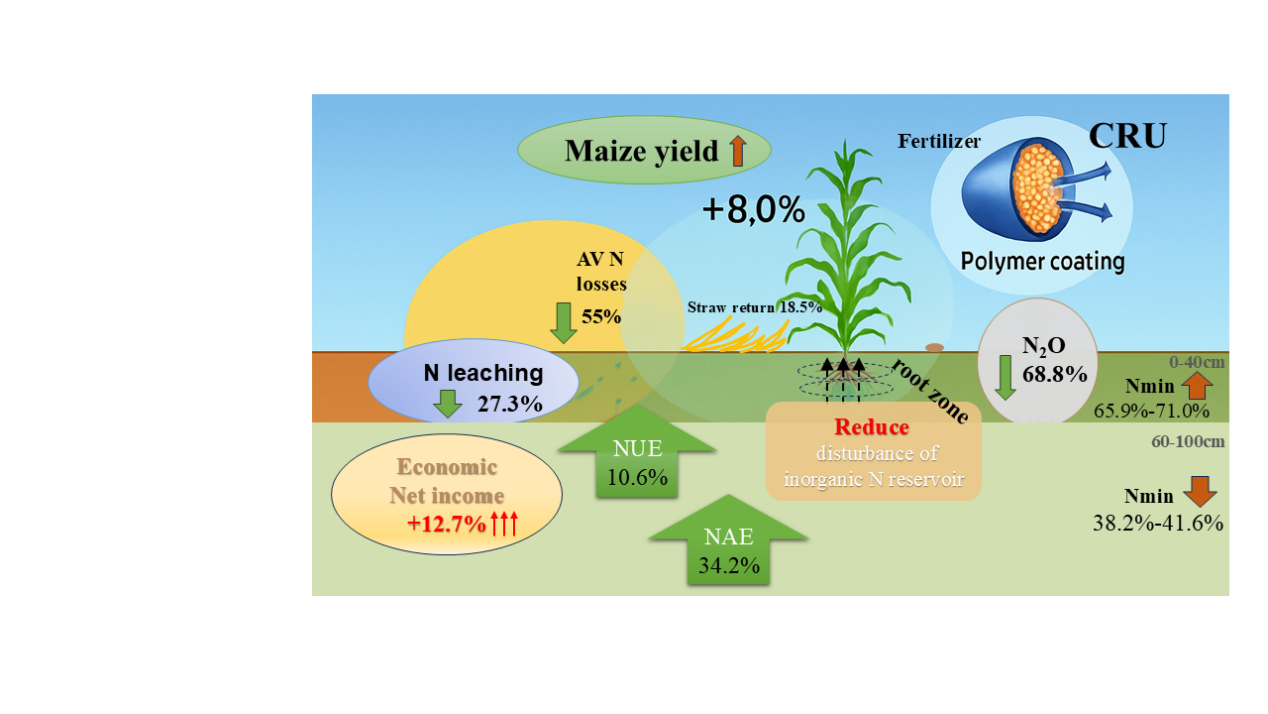

Supplement: Supplementary file 1 [file 22c79f163061f377efc37909.docx]
